# Supplementary material
Source: publisher figshare collection journal article supplement (https://springernature.figshare.com/ndownloader/files/22737143)

Ward A

Ward B

Ward C

Ward D

■ TOT positive answers ■ TOT negative

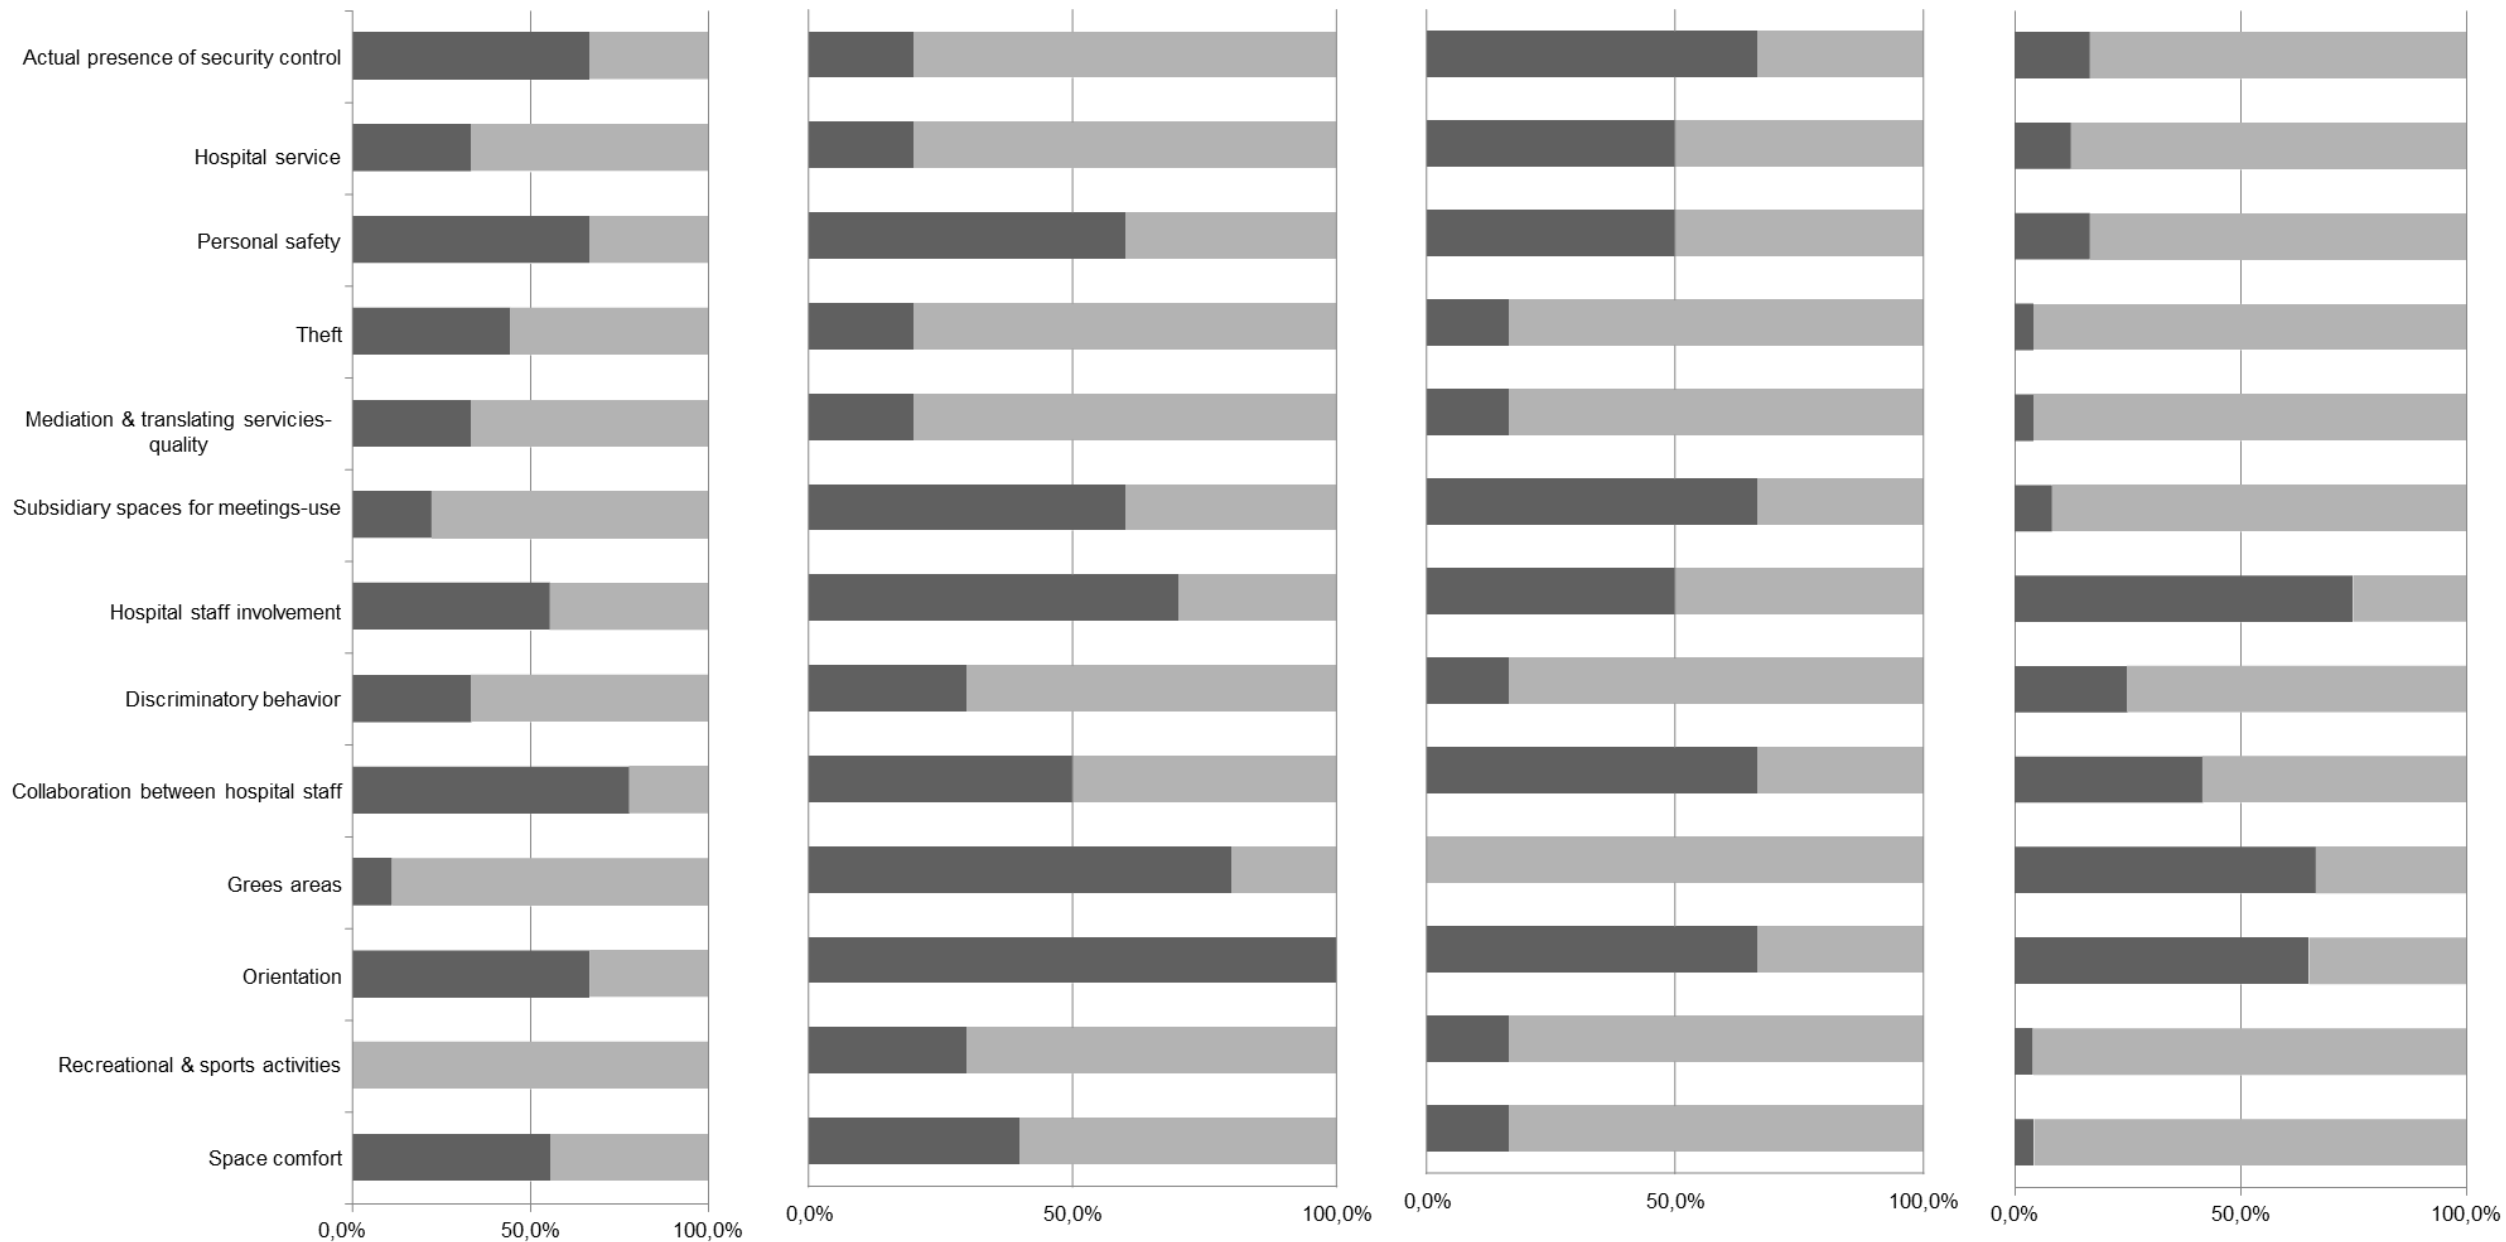

Supplement: Supplementary file 1 [file 22737143]

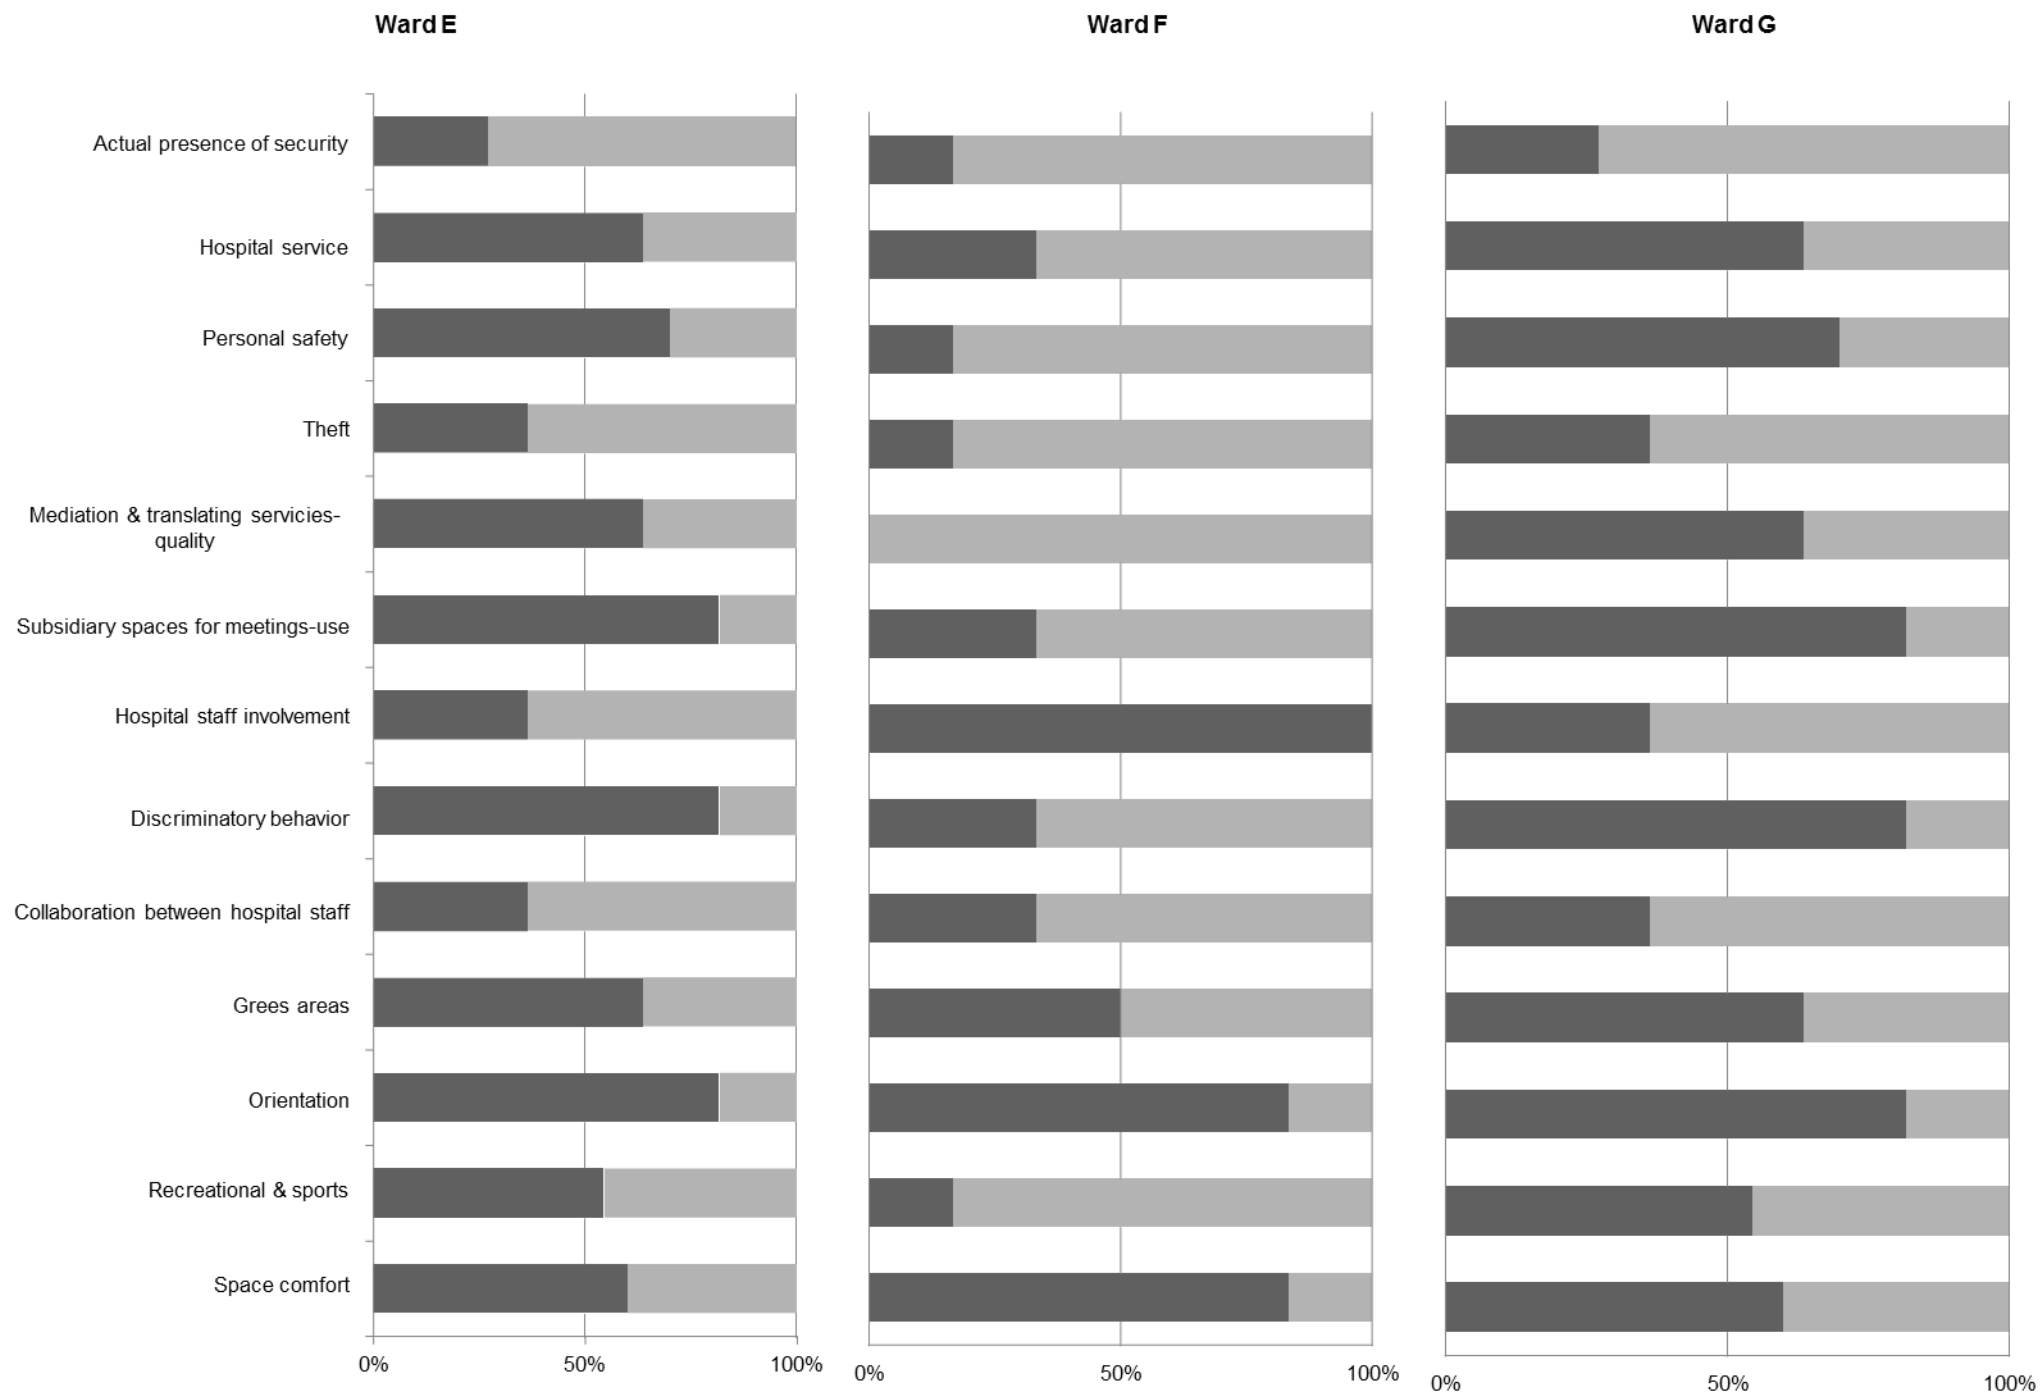

**Figure 3**

Supplement: Supplementary file 2 [file 22737143]
